# Supplementary material for: Andrographolide induces DNA damage in prostate cancer cells
Source: PubMed Central journal article supplement (PMC6383681; doi:10.18632/oncotarget.26628), 2019-02-01
Supplement: oncotarget-10-1085-s001.pdf [file oncotarget-10-1085-s001.pdf]

## Andrographolide induces DNA damage in prostate cancer cells

### SUPPLEMENTARY MATERIALS

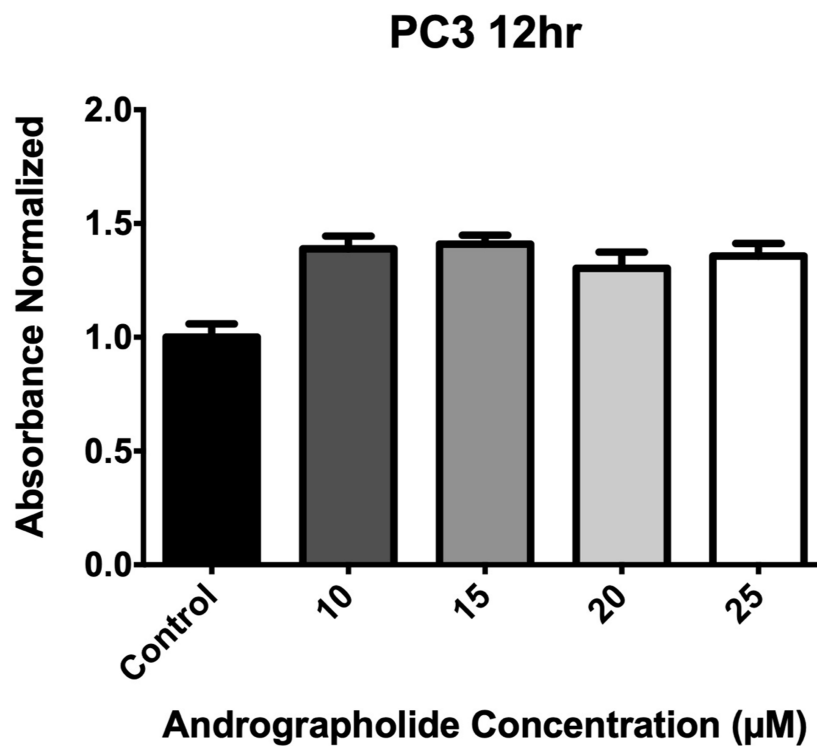

**Supplementary Figure 1: Andrographolide decreased cell viability in prostate cancer cells.** PC3 cells were treated with Andrographolide for 12 hours, but there were no significant changes in proliferation.

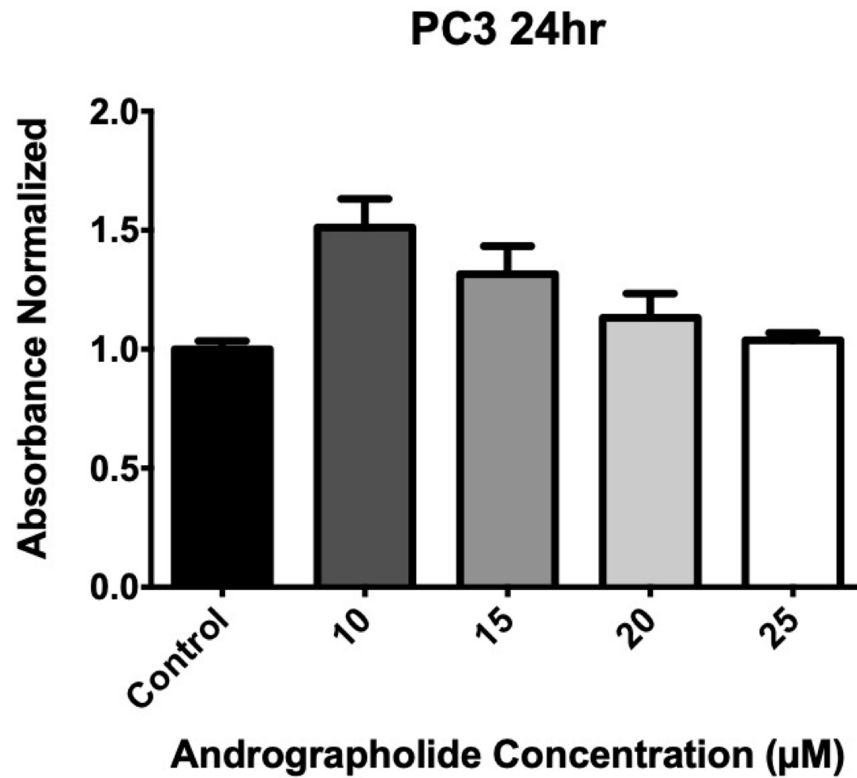

**Supplementary Figure 2: Andrographolide decreased cell viability in prostate cancer cells.** PC3 cells were treated with Andrographolide for 24 hours, but there were no significant changes in proliferation.

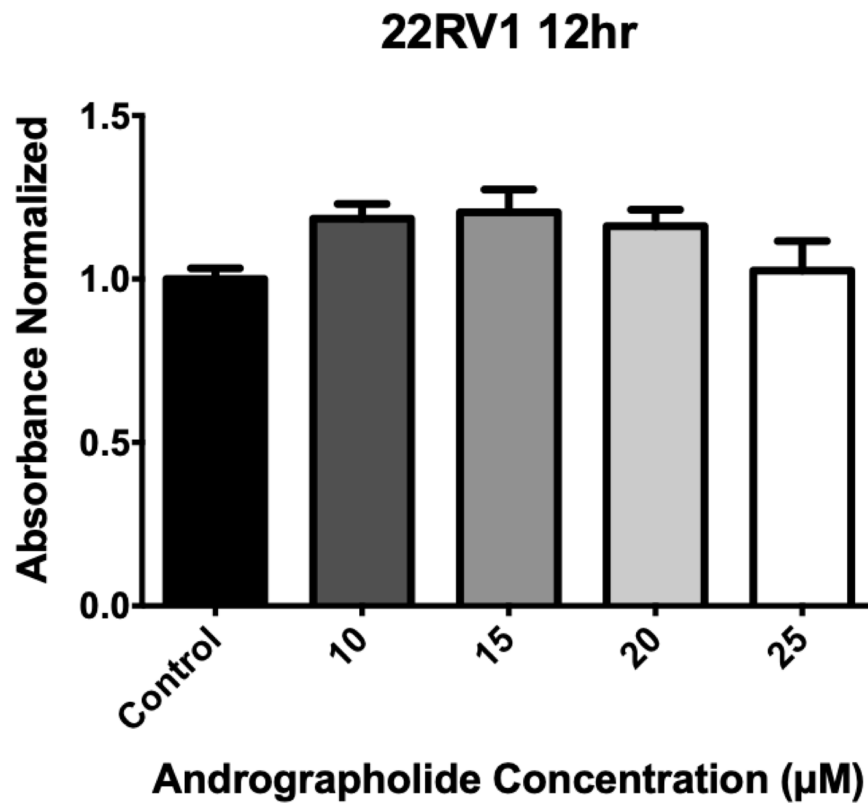

**Supplementary Figure 3: Andrographolide decreased cell viability in prostate cancer cells.** 22RV1 cells were treated with Andrographolide for 12 hours, but no significant changes were observed in the proliferation of these cells.

## LNCaP 12hr

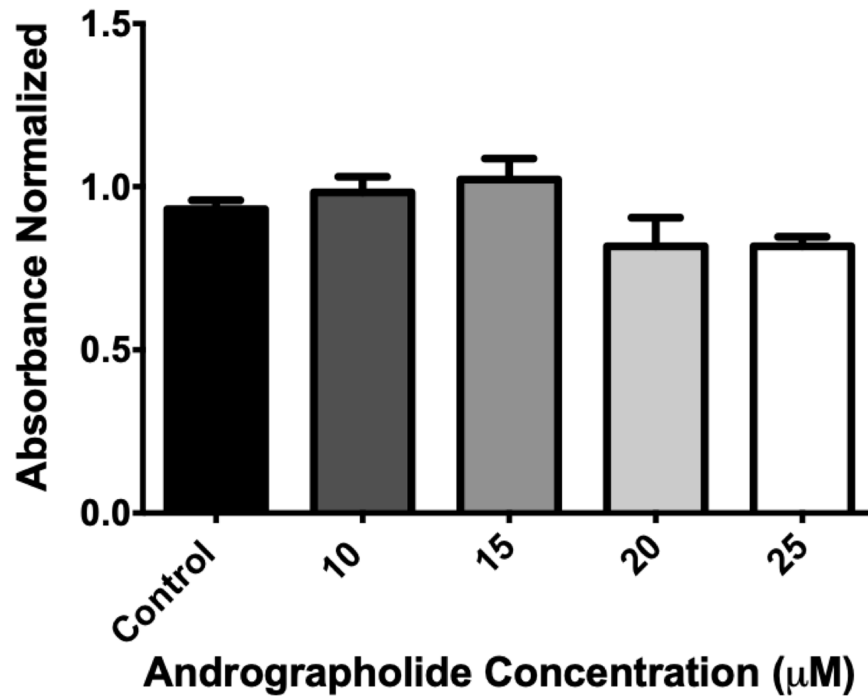

**Supplementary Figure 4: Andrographolide decreased cell viability in prostate cancer cells.** LNCaP cells were treated with Andrographolide for 12 hours, but there were no significant changes in proliferation.

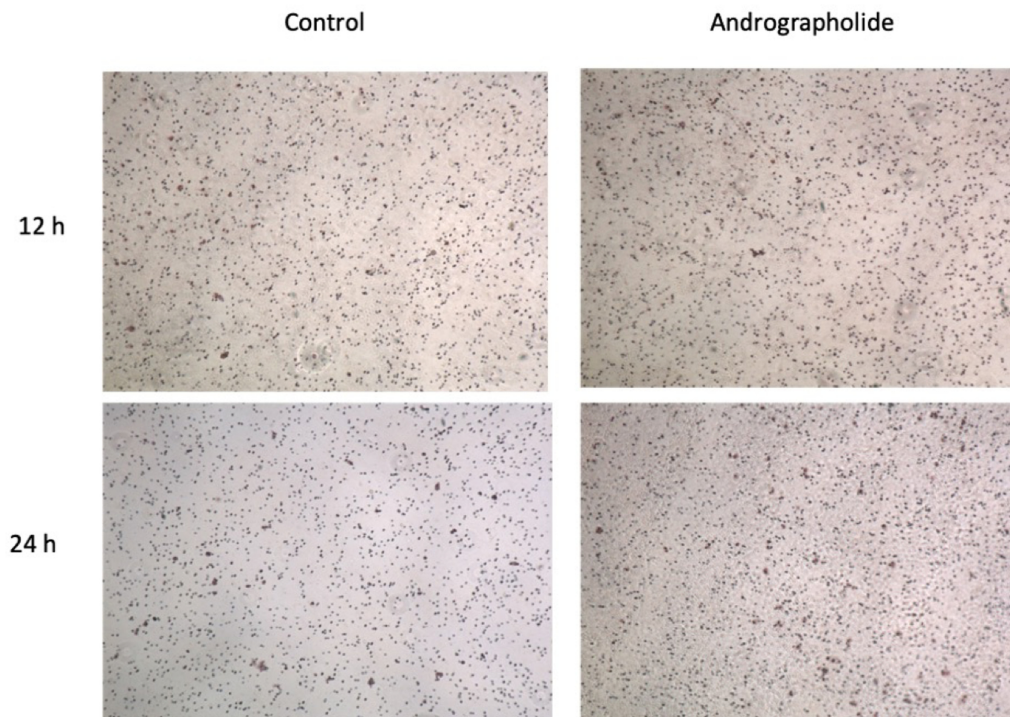

**Supplementary Figure 5: Andrographolide did not change invasion in 22RV1 cells.** The effect of Andrographolide (25 μM) in invasion was evaluated using transwell chamber method. 22RV1 cells were treated for 12 and 24 hours. Andrographolide did not change invasion in androgen dependent cells (22RV1).
